# Supplementary material for: Excessive cardiac insulin signaling exacerbates systolic dysfunction induced by pressure overload in rodents
Source: JCI journal article supplement (doi:10.1172/jci40096), 2010-04-20

## Supplementary Figure legends

### Figure 1 Echocardiographic analysis

Echocardiography was performed at indicated time points after TAC. \*\*P<0.01. Data are represented as mean  $\pm$  SEM; n=8-10. IVST, intraventricular septal thickness; FS, fractional shortening; LVDs, left ventricular end-systolic diameter.

### Figure 2 Cardiac insulin signaling in the TAC heart at 1 week after operation

(A) Mice were subjected to TAC or sham operation (Sham), and heart samples were obtained 1 week later. Mice were starved for 6 hours, and insulin or PBS was injected before sacrifice. Phospho-IRS1 (pIrs1) and phospho-Akt (pAkt) levels in the heart were examined by Western blot analysis. The graphs indicate relative expression levels of pIrs1 and pAkt. \*P<0.05, \*\*P<0.01. Data are shown as the mean  $\pm$  SEM; n=3.

(B) Mice were subjected to TAC or sham operation (Sham) and were sacrificed 1 week later. Components of the insulin signaling pathway in the heart were examined by Western blot analysis. The graphs indicate relative expression levels of these signaling molecules. \*P<0.05, \*\*P<0.01. Data are shown as the mean  $\pm$  SEM; n=3.

(C) Mice were subjected to TAC or sham operation (Sham) and echocardiography was performed at 6 weeks after TAC. \*P<0.05, \*\*P<0.01. Data are shown as the mean  $\pm$  SEM; n=3-5.

### Figure 3 Up-regulation of cardiac insulin signals in spontaneously hypertensive rats (SHR)

(A) Eight-week-old Wistar-Kyoto rats (WKY) and spontaneously hypertensive rats (SHR) were starved for 6 hours, and insulin or PBS was injected before sacrifice. Phospho-Irs1 (pIrs1) and phospho-Akt (pAkt) levels in the heart were examined by Western blot analysis. The graphs indicate relative expression levels of pIrs1 and pAkt.

\*P<0.05, \*\*P<0.01. Data are shown as the mean  $\pm$  SEM; n=3.

(B) Blood pressure measurement in Wistar-kyoto rats (WKY) and spontaneously hypertensive rats (SHR) at 8 weeks old. \*P<0.05, \*\*P<0.01. Data are shown as the mean  $\pm$  SEM; n=4.

(C) Cardiac hypertrophy and systolic function were assessed by echocardiography at 8 weeks old. IVST, intraventricular septal thickness; FS, fractional shortening; LVDs, left ventricular end-systolic diameter. \*P<0.05, \*\*P<0.01. Data are shown as the mean  $\pm$  SEM; n=3–5.

(D) Immunohistochemistry using antibodies against platelet and endothelial cell adhesion molecule (dark brown) and dystrophin (light brown) was performed at 8 weeks old. Scale bar, 20  $\mu$ m. The cross-sectional area (CSA) of cardiomyocytes and relative vascular density were estimated as described in Methods. \*P<0.05, \*\*P<0.01. Data are shown as the mean  $\pm$  SEM; n=3.

(E) Blood pressure measurement in Wistar-kyoto rats and spontaneously hypertensive rats (SHR) at 18 weeks old. \*P<0.05, \*\*P<0.01. Data are shown as the mean  $\pm$  SEM; n=4.

(F) Cardiac hypertrophy and systolic function were assessed by echocardiography at 18 weeks old. IVST, intraventricular septal thickness; FS, fractional shortening; LVDs, left ventricular end-systolic diameter. \*P<0.05, \*\*P<0.01. Data are shown as the mean  $\pm$  SEM; n=5.

(G) Immunohistochemistry double-stained with antibodies for platelet and endothelial cell adhesion molecule (dark brown) and dystrophin (light brown) was performed at 18 weeks old. Scale bar, 20  $\mu$ m. The cross-sectional area (CSA) of cardiomyocytes and relative vascular density were estimated as described in Methods. \*P<0.05, \*\*P<0.01. Data are shown as the mean  $\pm$  SEM; n=3.

**Figure 4 Blood analysis**

STZ- or vehicle-treated mice were subjected to TAC or sham operation (Sham). Plasma glucose and insulin levels were measured 2 weeks after operation. In the insulin-treated group, daily intraperitoneal injection of insulin (0.1 IU/g/day) was performed from 9 weeks (2 weeks after STZ treatment) to 13 weeks of age (2 weeks after TAC). \*\*P<0.01. Data are represented as mean  $\pm$  SEM; n=5.

**Figure 5 Effect of COMP-Ang1 on cardiac dysfunction under chronic pressure overload**

(A) Insulin-treated diabetic mice were subjected to TAC operation and simultaneously treated with adenoviral vector encoding COMP-Ang1 or LacZ. Immunohistochemistry using antibodies against platelet and endothelial cell adhesion molecule (dark brown) and dystrophin (light brown) was performed at 2 weeks after operation. Scale bar, 20  $\mu$ m. The cross-sectional area (CSA) of cardiomyocytes and relative vascular density were estimated as described in Methods. \*P<0.05, \*\*P<0.01. Data are shown as the mean  $\pm$  SEM; n=3.

(B) Cardiac ischemia (brown) in mice prepared according to the legend for Supplemental Figure 5A was estimated with a Hypoxyprobe 2 weeks after operation. Scale bar, 1 mm.

(C) Cardiac hypertrophy and systolic function were assessed by echocardiography 2 weeks after operation. FS, fractional shortening; LVDs, left ventricular end-systolic diameter. \*P<0.05, \*\*P<0.01. Data are shown as the mean  $\pm$  SEM; n=3-5.

**Figure 6 Echocardiography of CIRKO mice at 6 weeks after TAC operation**

CIRKO mice (*Ins1<sup>flox/+</sup> Cre<sup>+</sup>*) or littermate controls (Control) were subjected to TAC or sham operation (Sham). Cardiac hypertrophy and systolic function was assessed by echocardiography 6 weeks after TAC. FS, fractional shortening; LVDs, left ventricular

end-systolic diameter. \*P<0.05, \*\*P<0.01. Data are shown as the mean  $\pm$  SEM; n=3.

**Figure 7 Acute pressure overload in heterozygous CIRKO mice**

CIRKO mice (*Insr*<sup>flox/+</sup> Cre<sup>+</sup>) were subjected to TAC or sham operation (Sham), and heart samples were obtained at the indicated times. Phospho-Irs1 (pIrs1) levels were examined by Western blot analysis. The graphs indicate relative expression levels of pIrs1. \*P<0.05, \*\*P<0.01. Data are shown as the mean  $\pm$  SEM; n=3.

**Figure 8 Involvement of insulin-like growth factor 1 and its receptor**

Small-interfering RNA targeting insulin-like growth factor 1 (Igf1) or the Igf1 receptor (Igf1r) was introduced into cardiomyocytes, after which the cells were subjected to mechanical stretch. Phospho-Irs1 (pIrs1) levels were examined by Western blot analysis. The graphs indicate relative expression levels of pIrs1. \*P<0.05, \*\*P<0.01. Data are shown as the mean  $\pm$  SEM; n=3.

Supplemental Figure 1

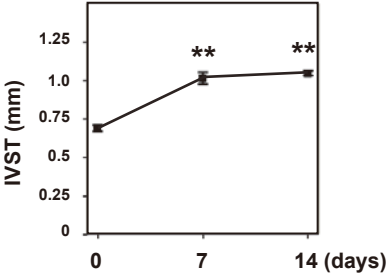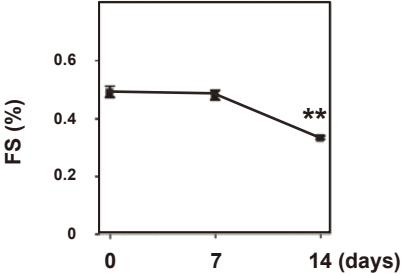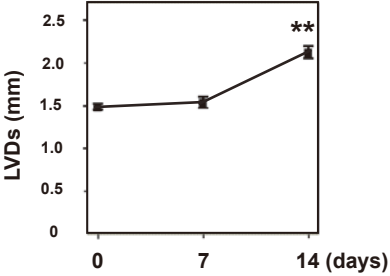

## Supplemental Figure 2

**A**

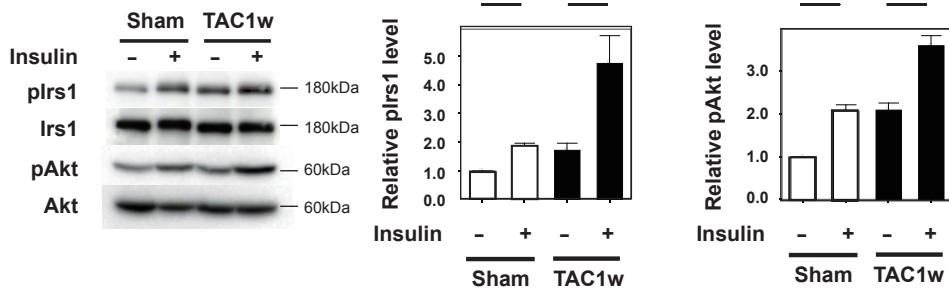

**B**

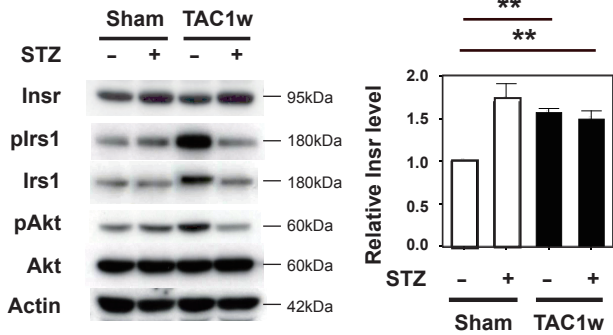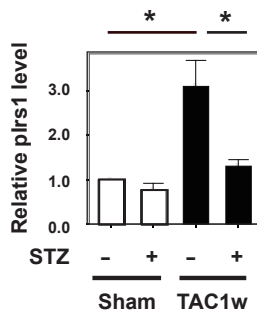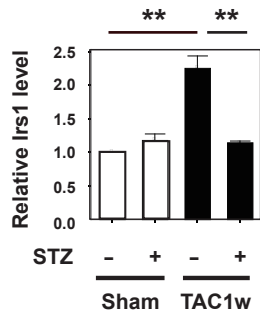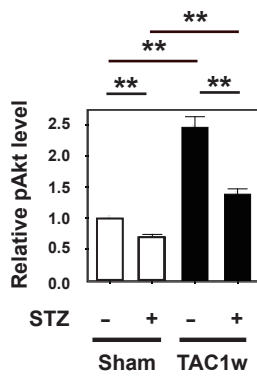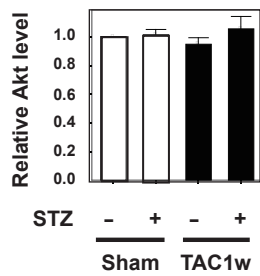

**C**

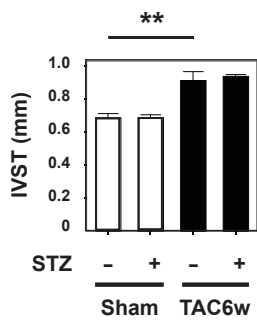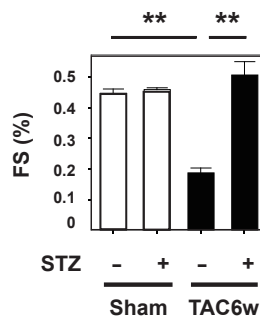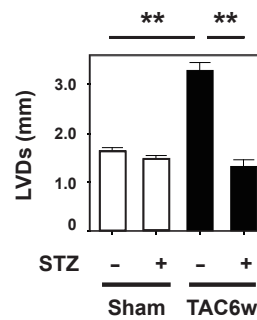

# Supplemental Figure 3

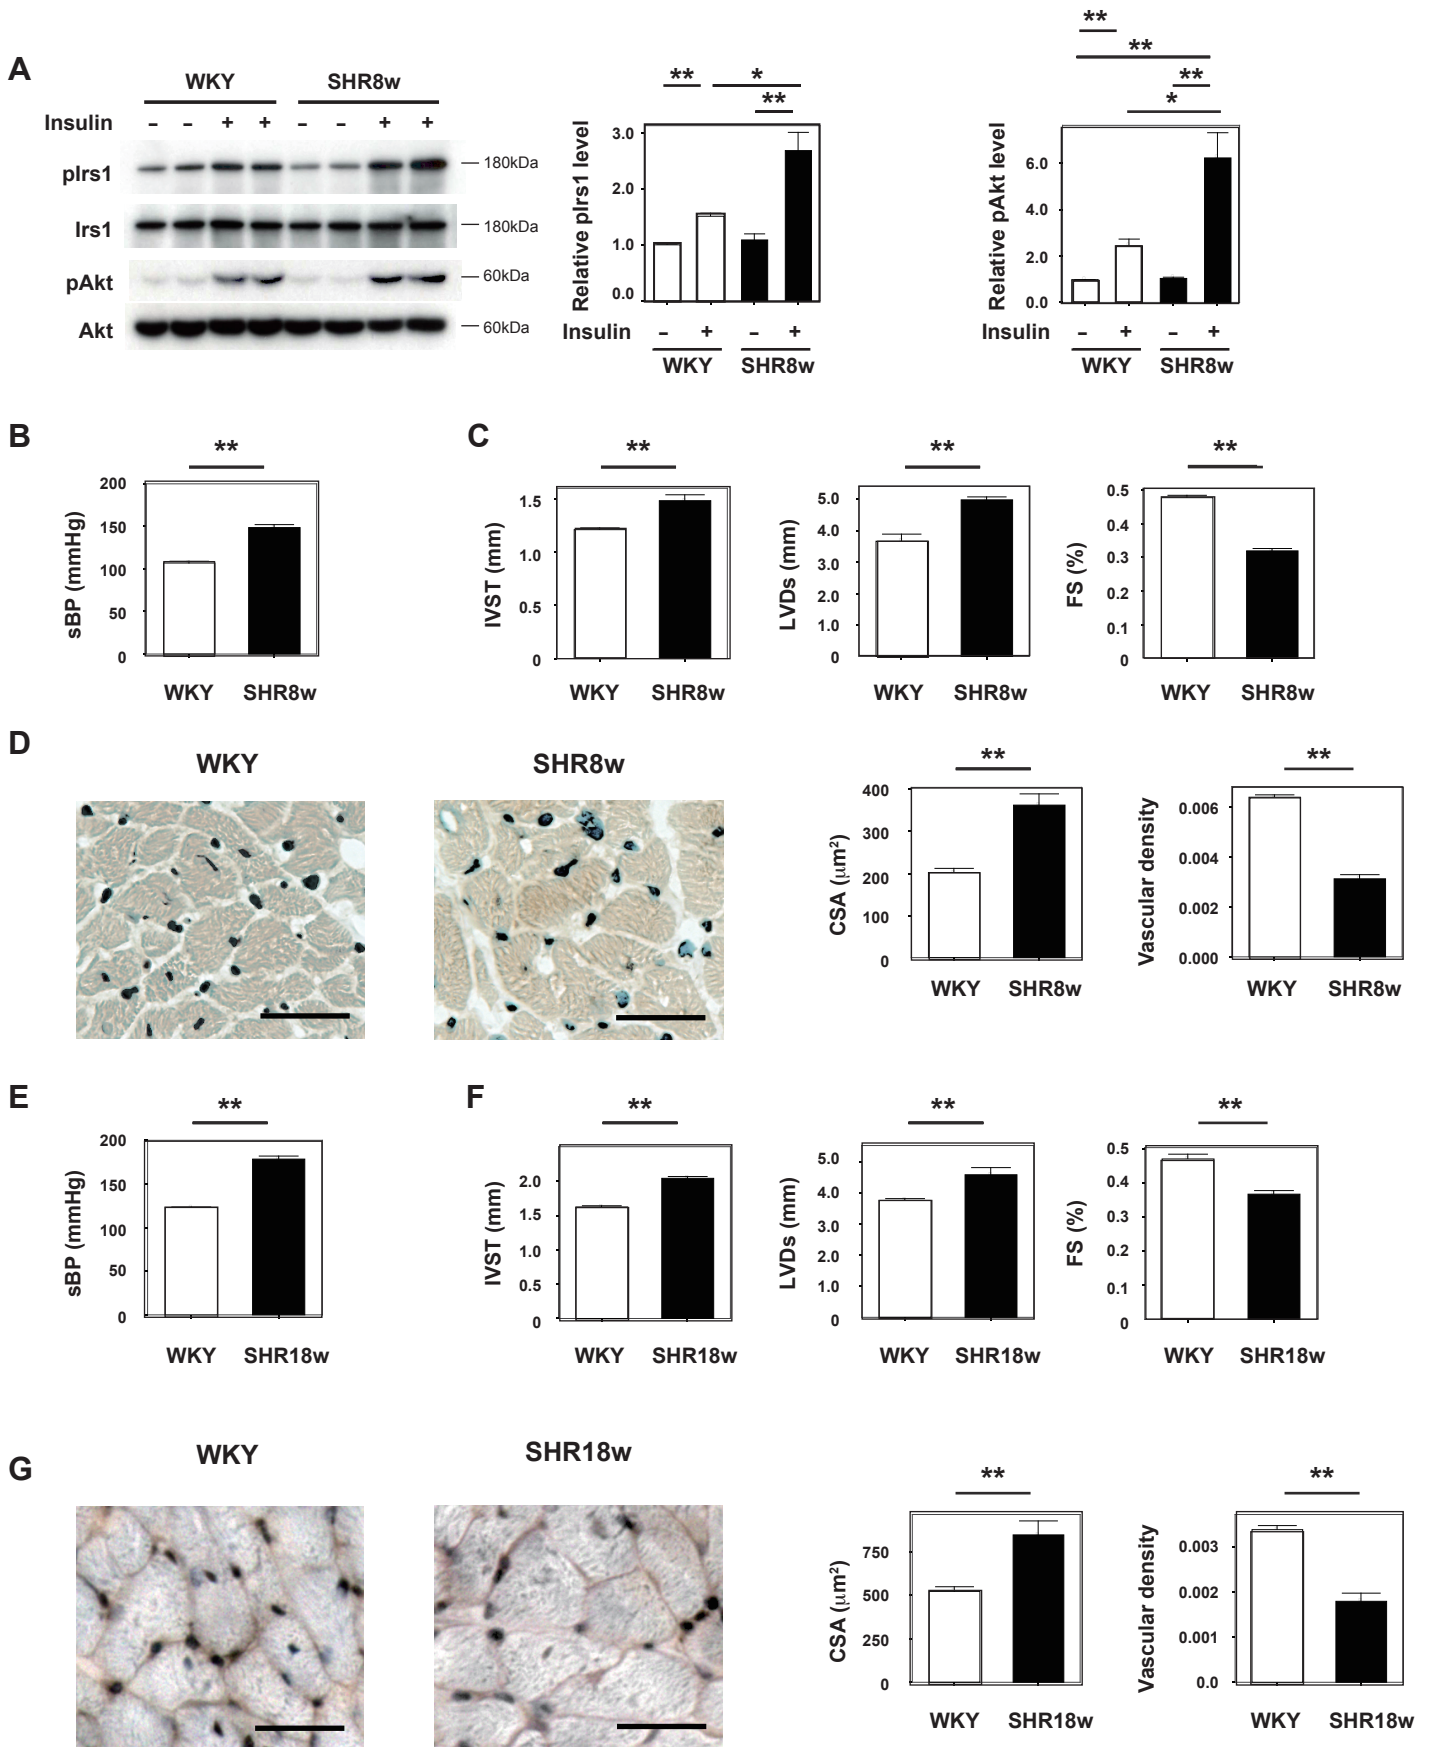

# Supplemental Figure 4

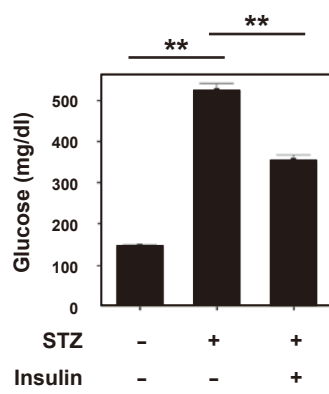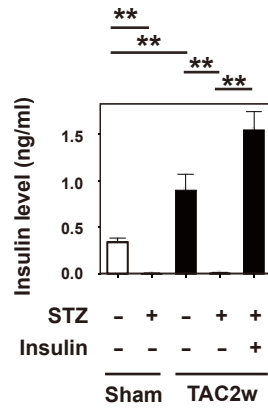



## Supplemental Figure 5

**A**

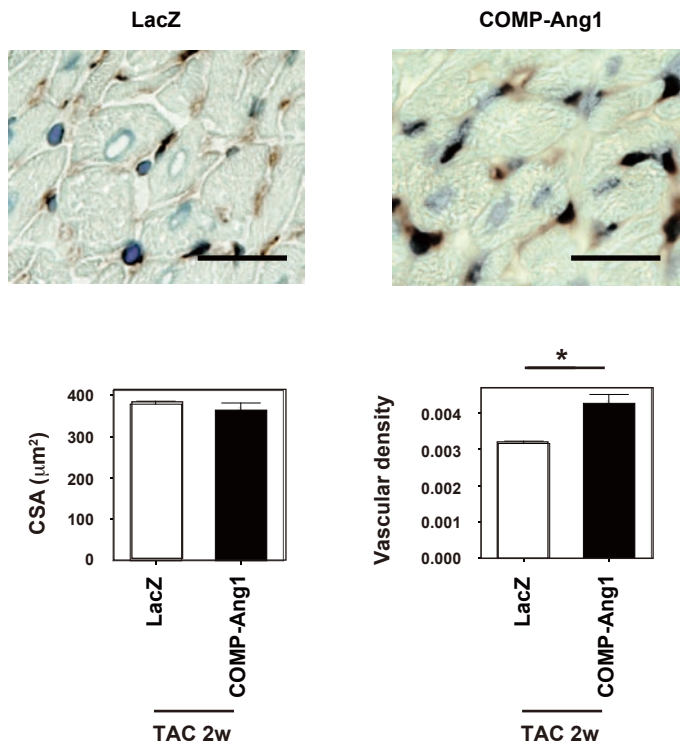

**B**

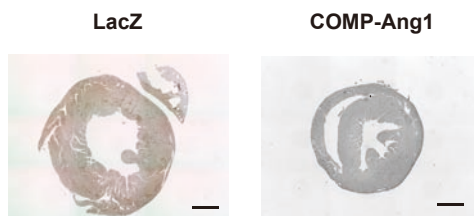

**C**

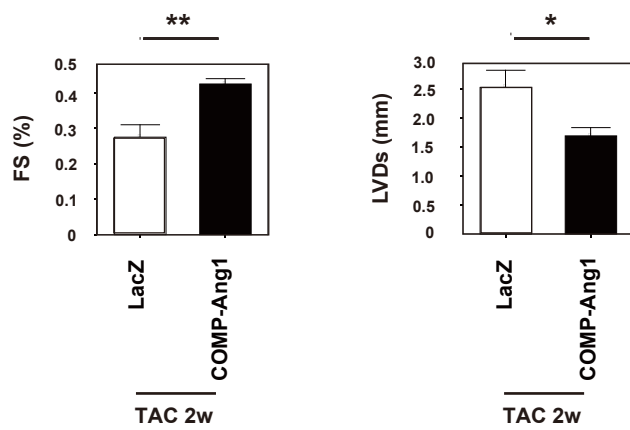

## Supplemental Figure 6

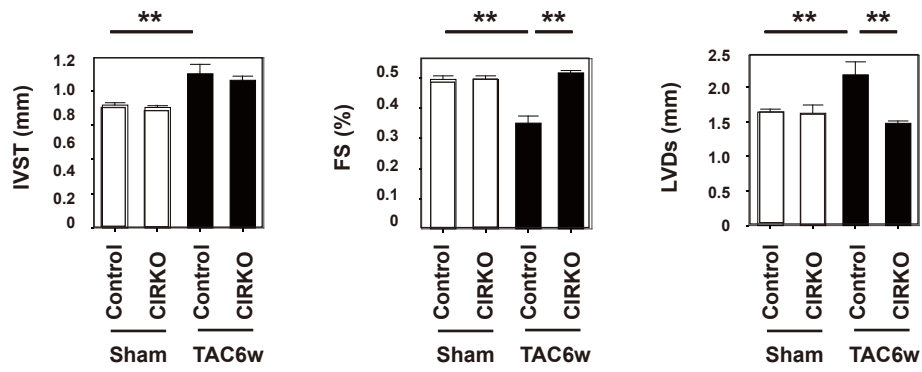

## Supplemental Figure 7

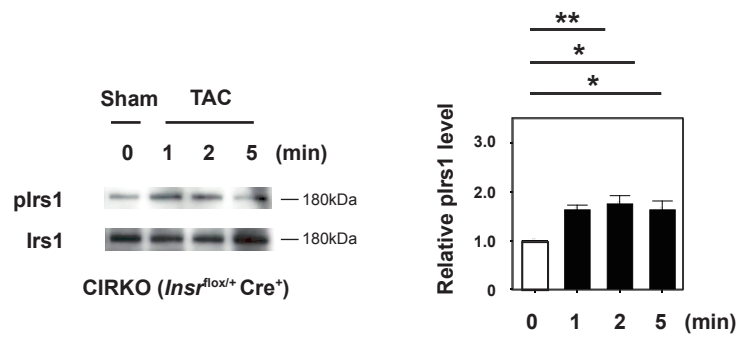

Supplemental Figure 8

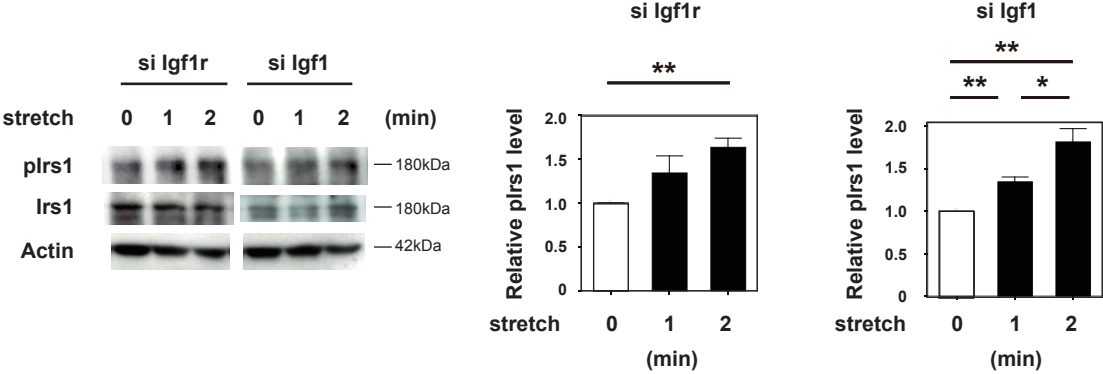

Supplement: sd1 [file 1]
